# Supplementary material for: Natural product preferentially targets redox and metabolic adaptations and aberrantly active STAT3 to inhibit breast tumor growth in vivo
Source: PubMed Central journal article supplement (PMC9726930; doi:10.1038/s41419-022-05477-2), 2022-12-06

Fig. 2B. MDA-MB-468

Supplementary Figures

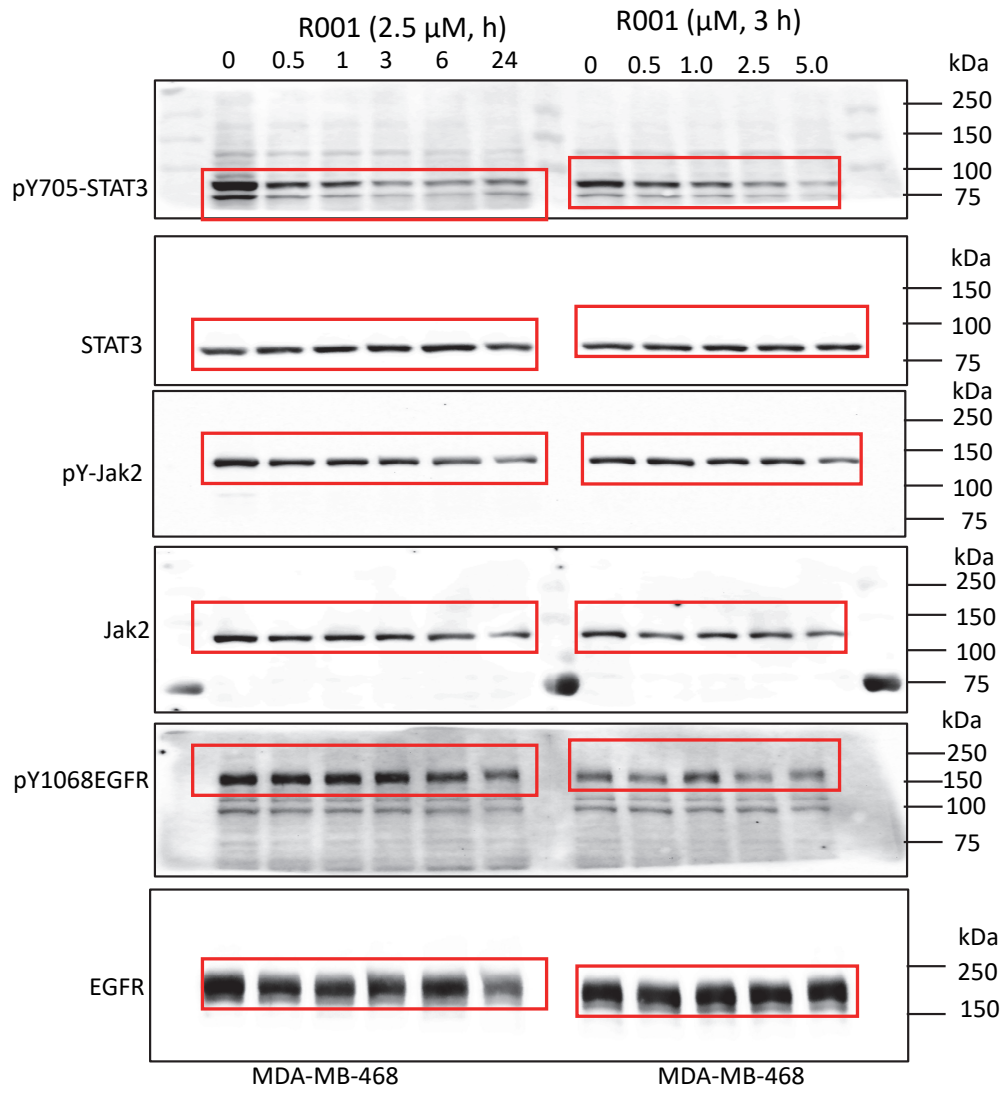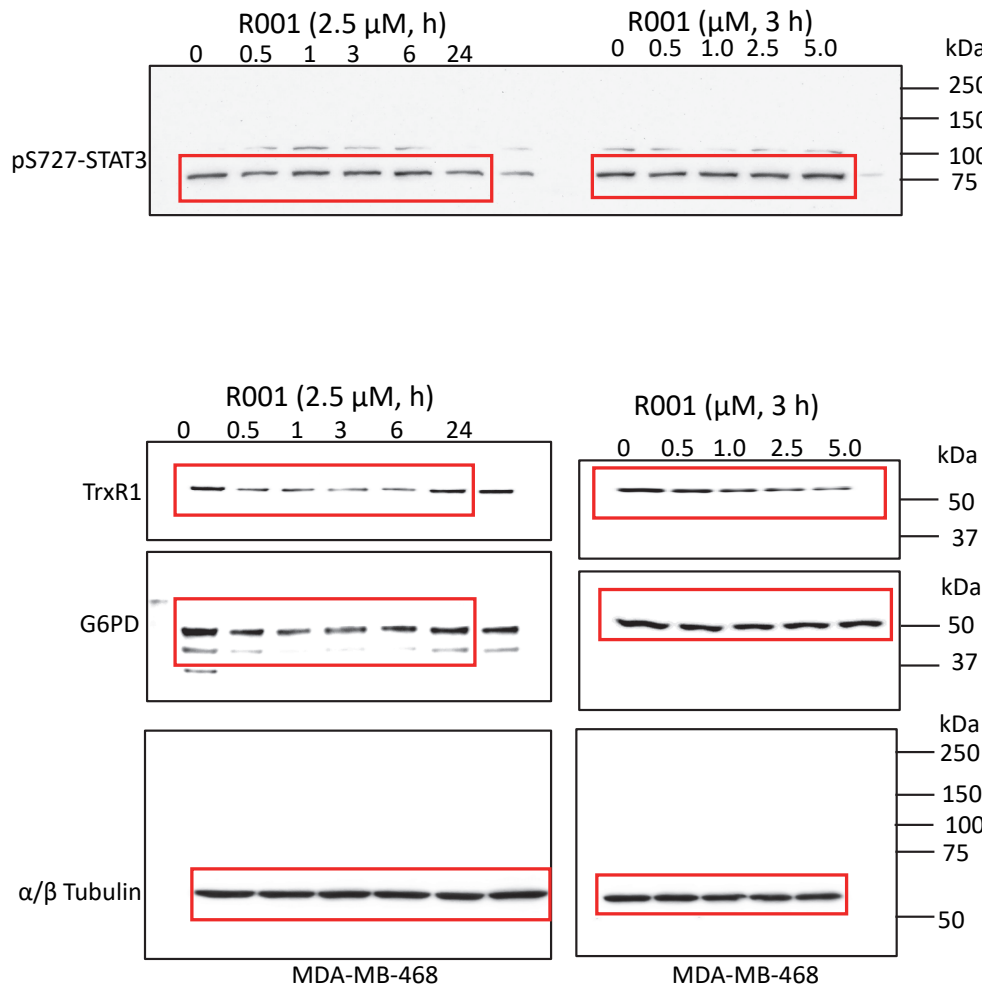

Fig. 2B. MDA-MB-231

Supplementary Figures

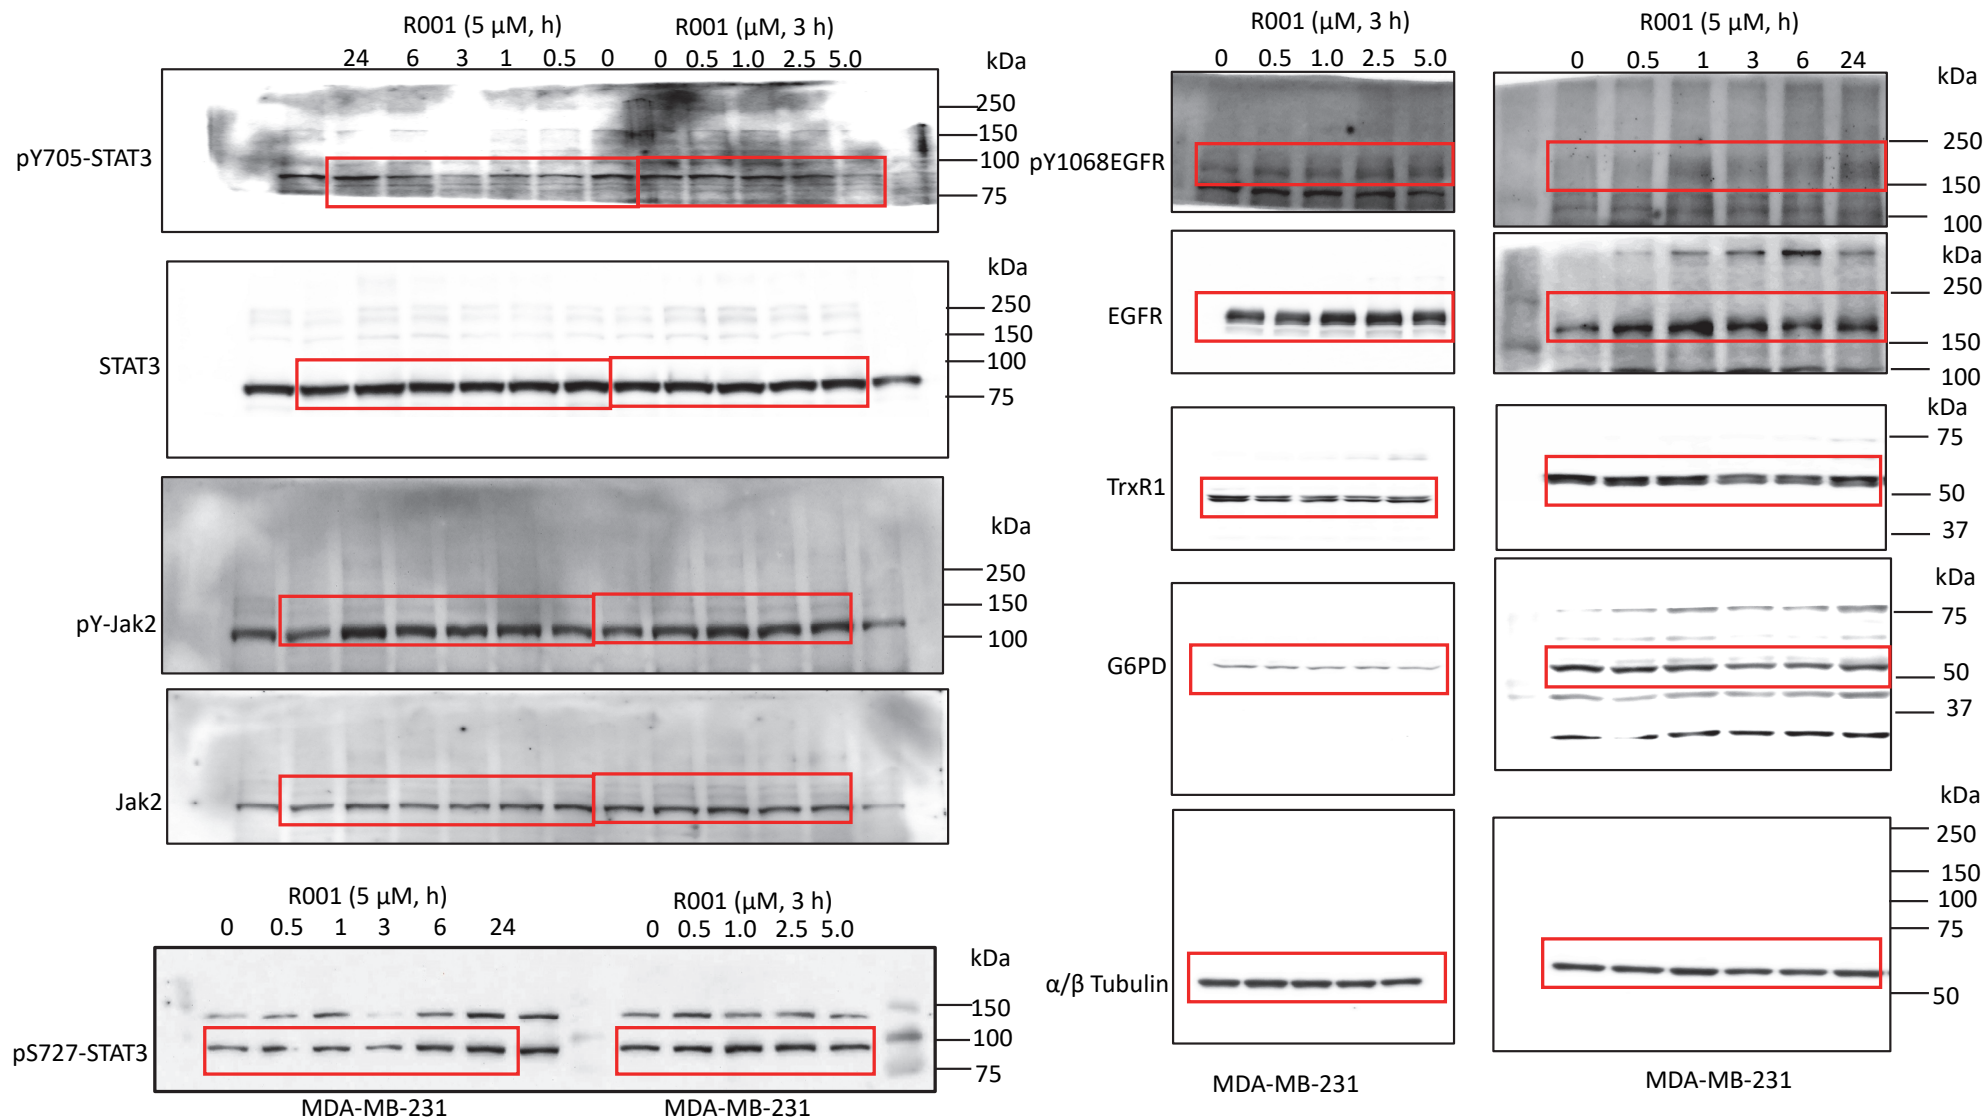

Supplementary Figures

Fig.2C

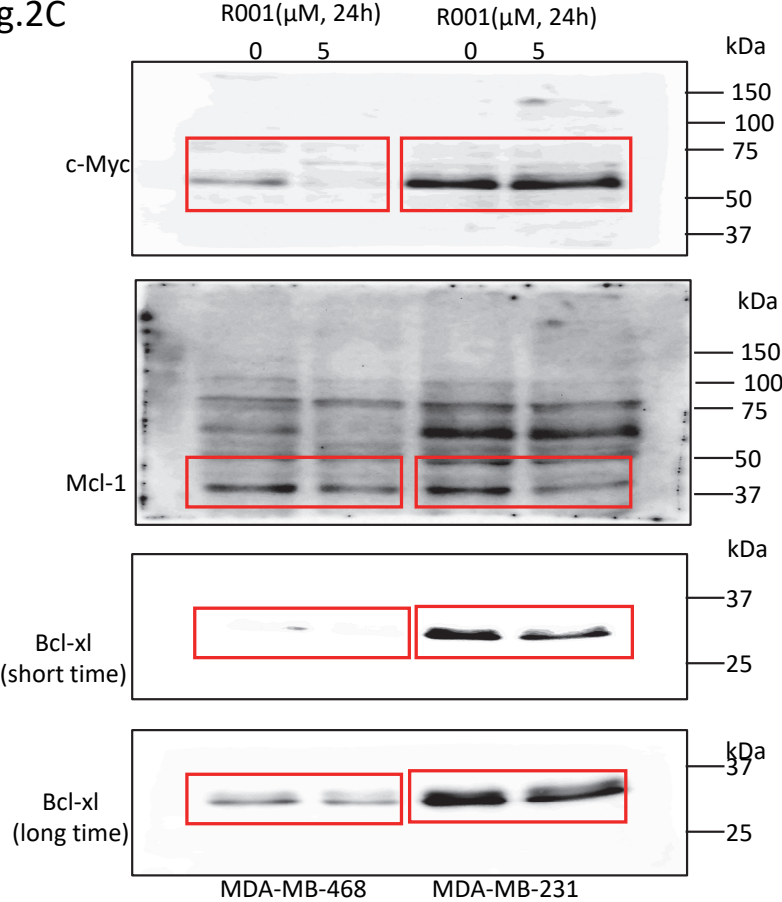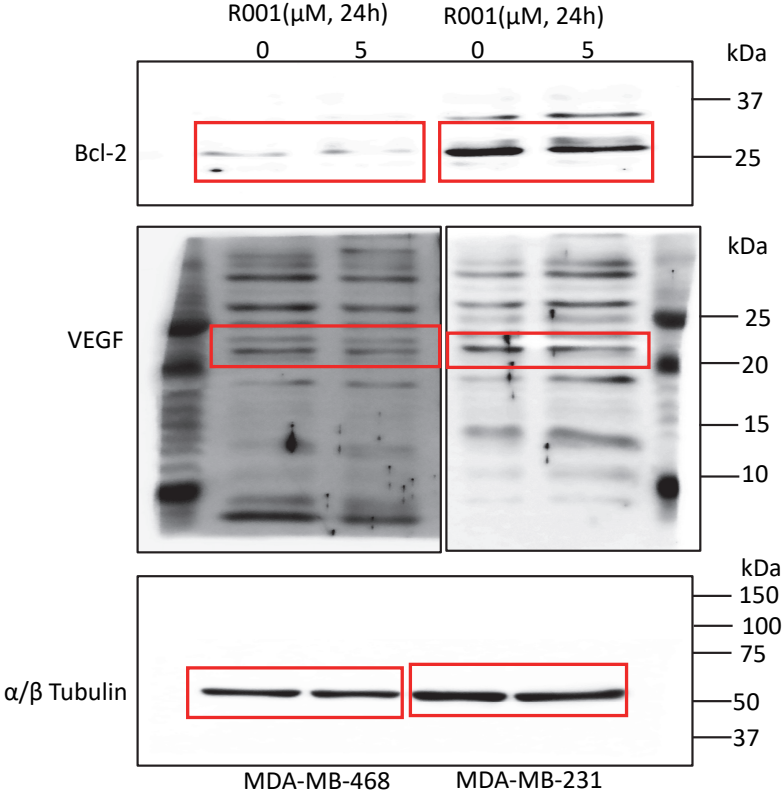

Supplementary Figures

Fig.2D

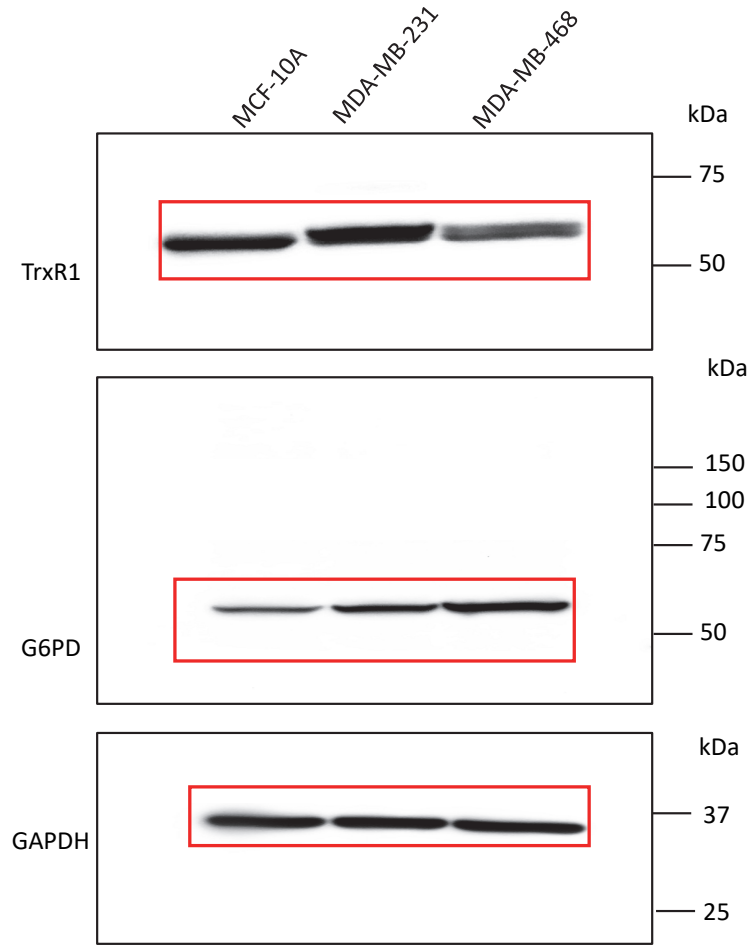

Fig.2G

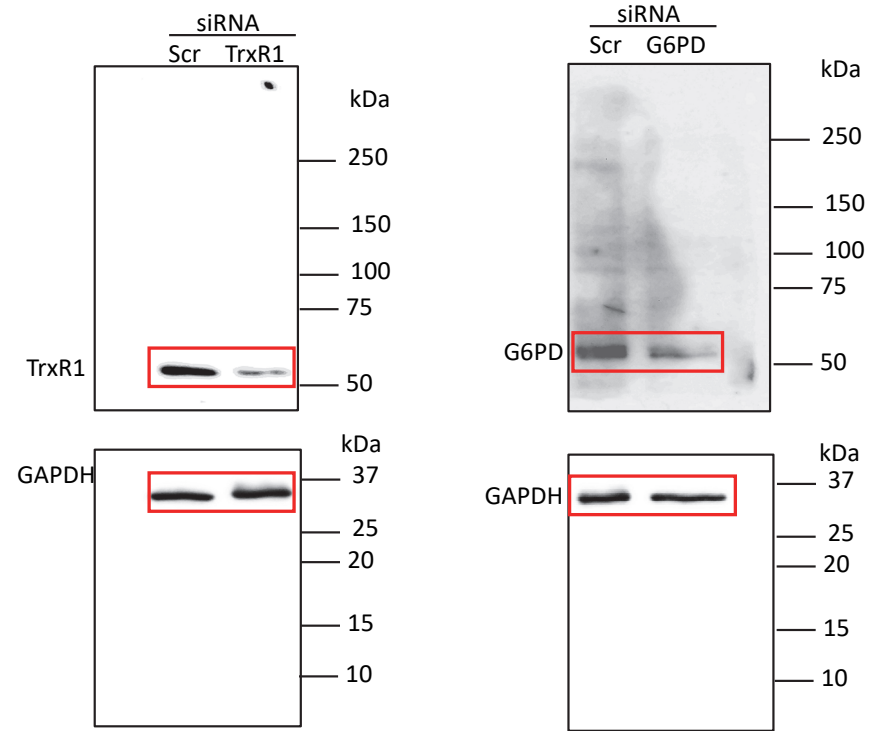

Fig.4C

Supplementary Figures

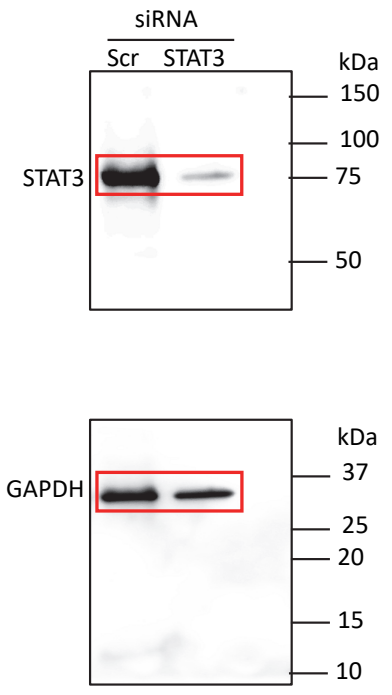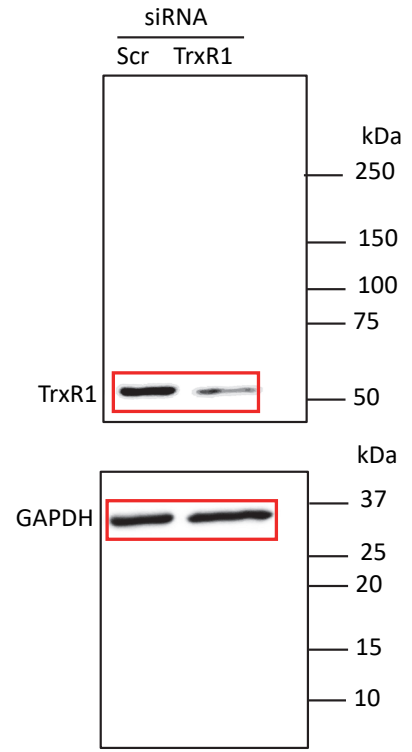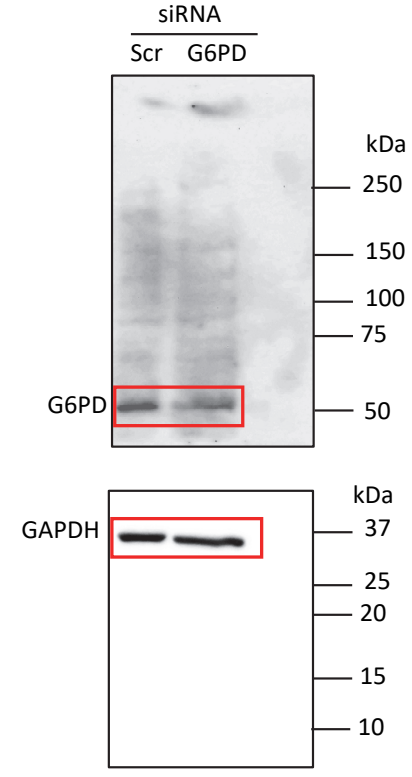

Fig.5A

Supplementary Figures

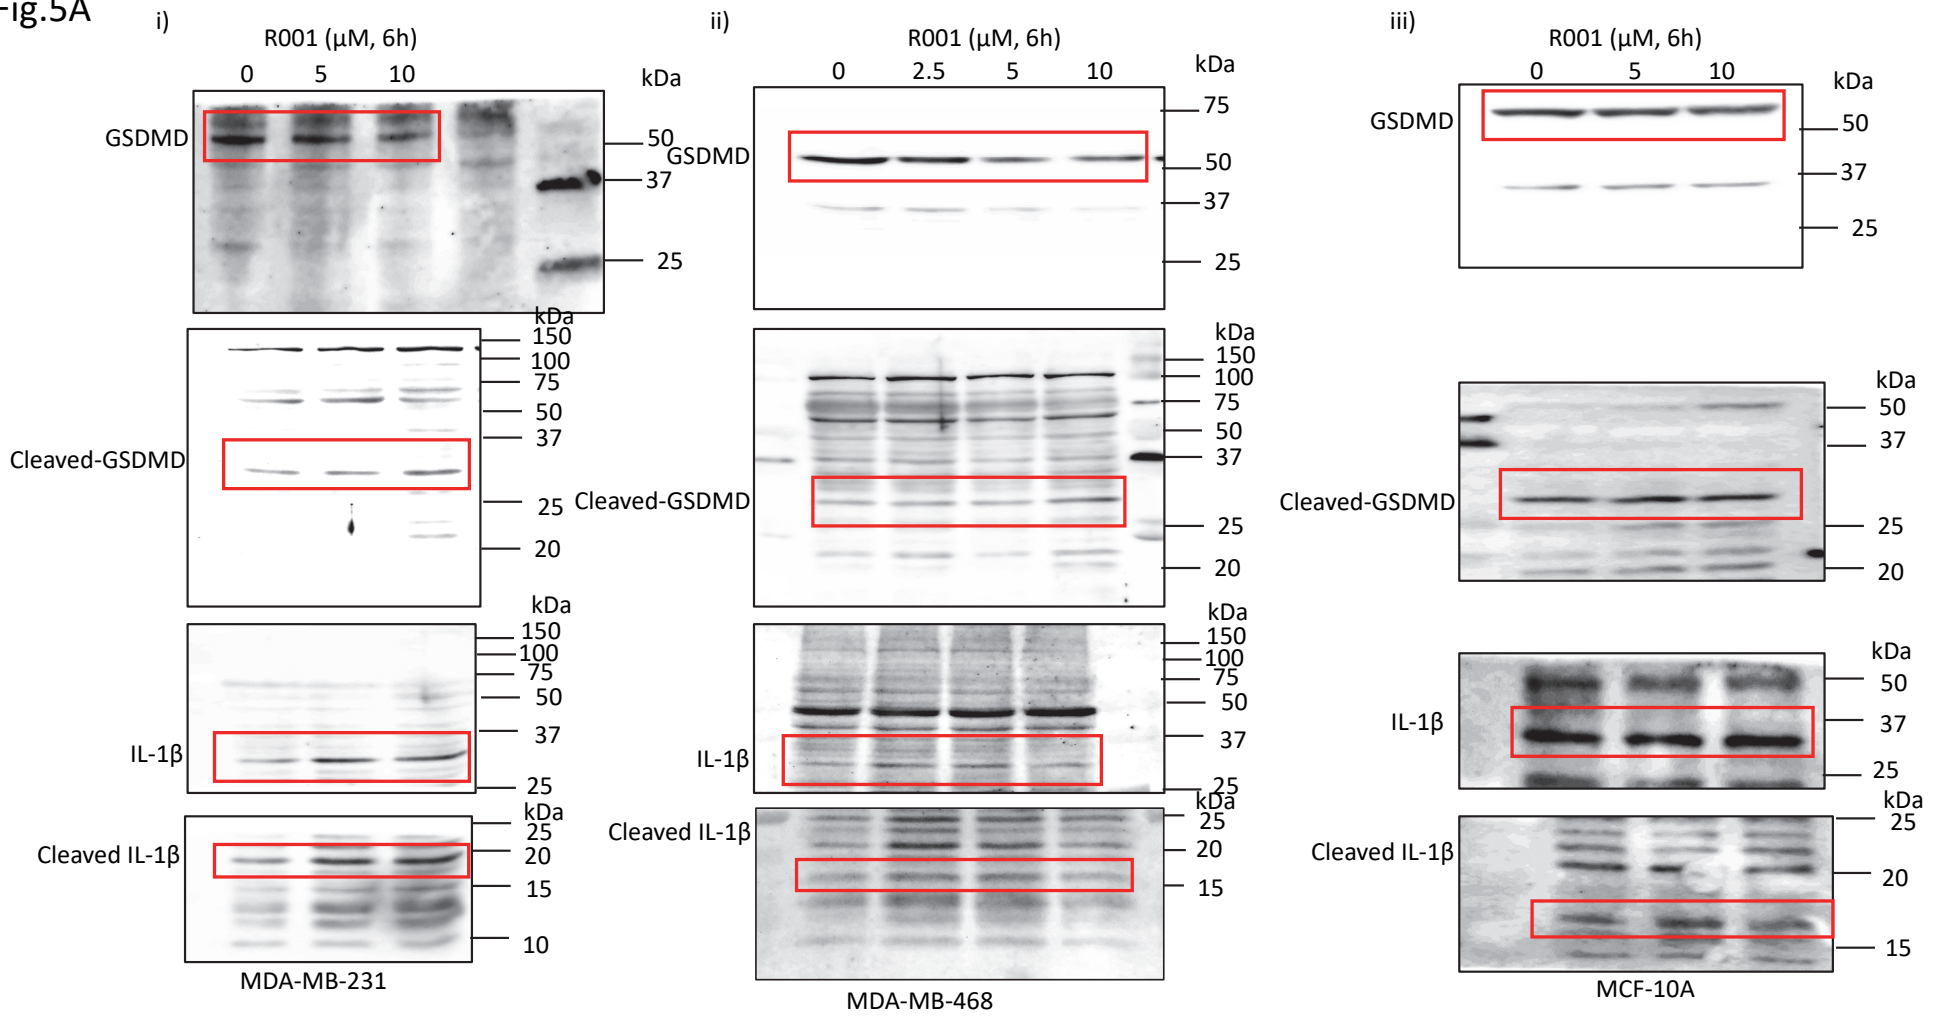

Fig.5A

Supplementary Figures

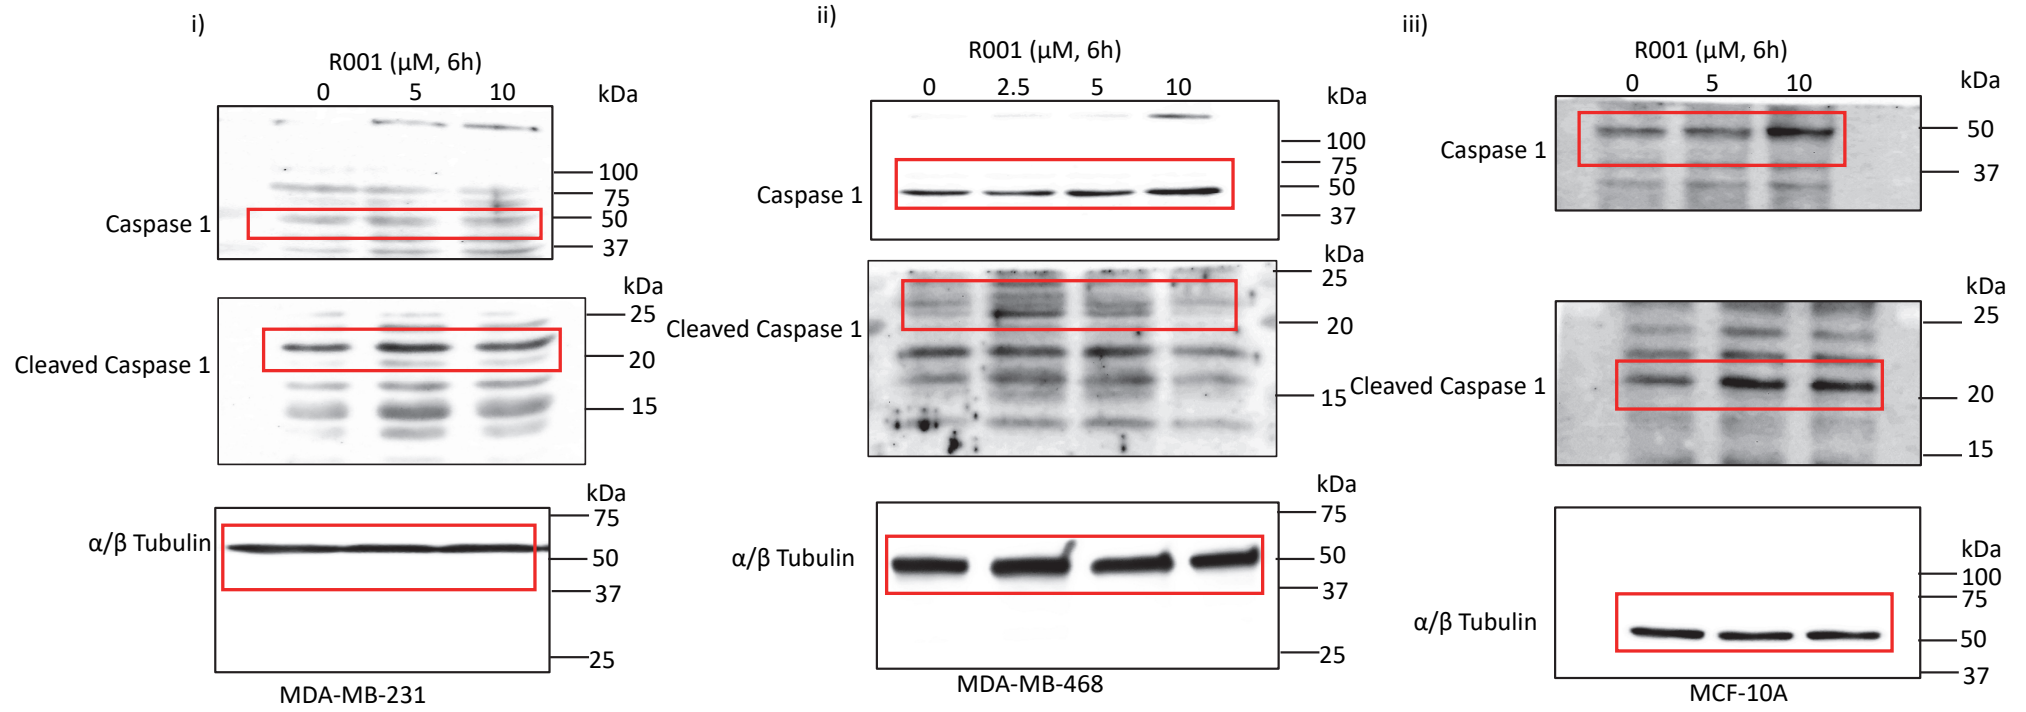



Fig.5F

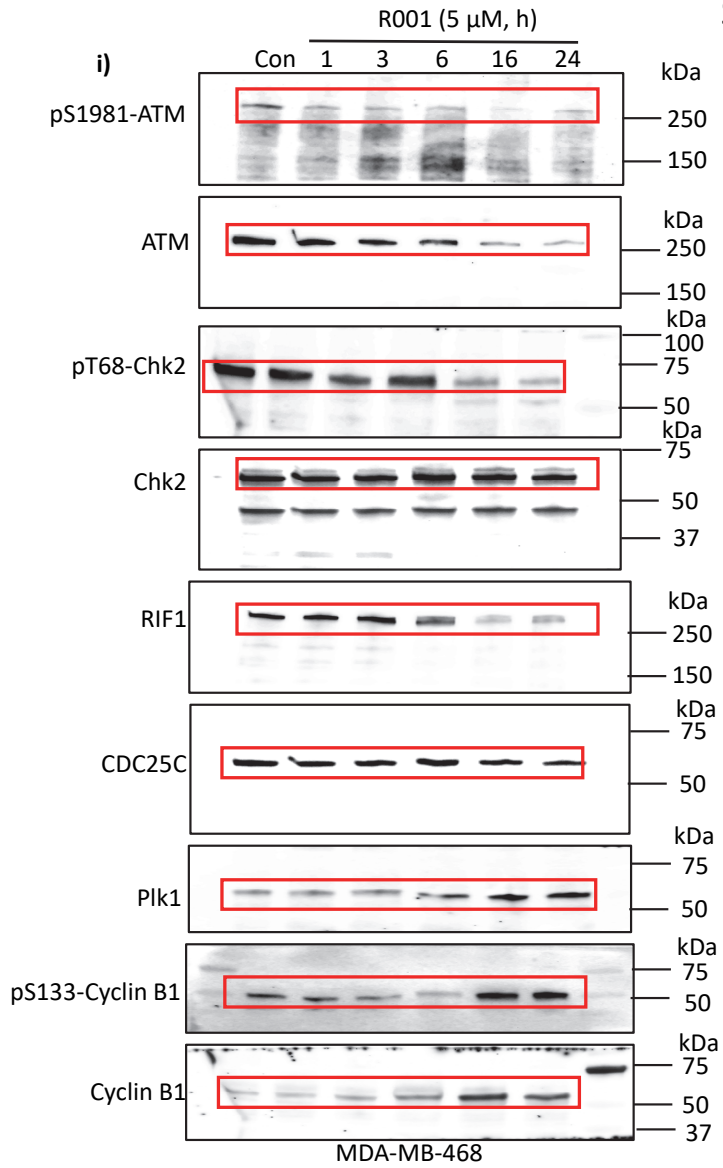

Supplementary Figures

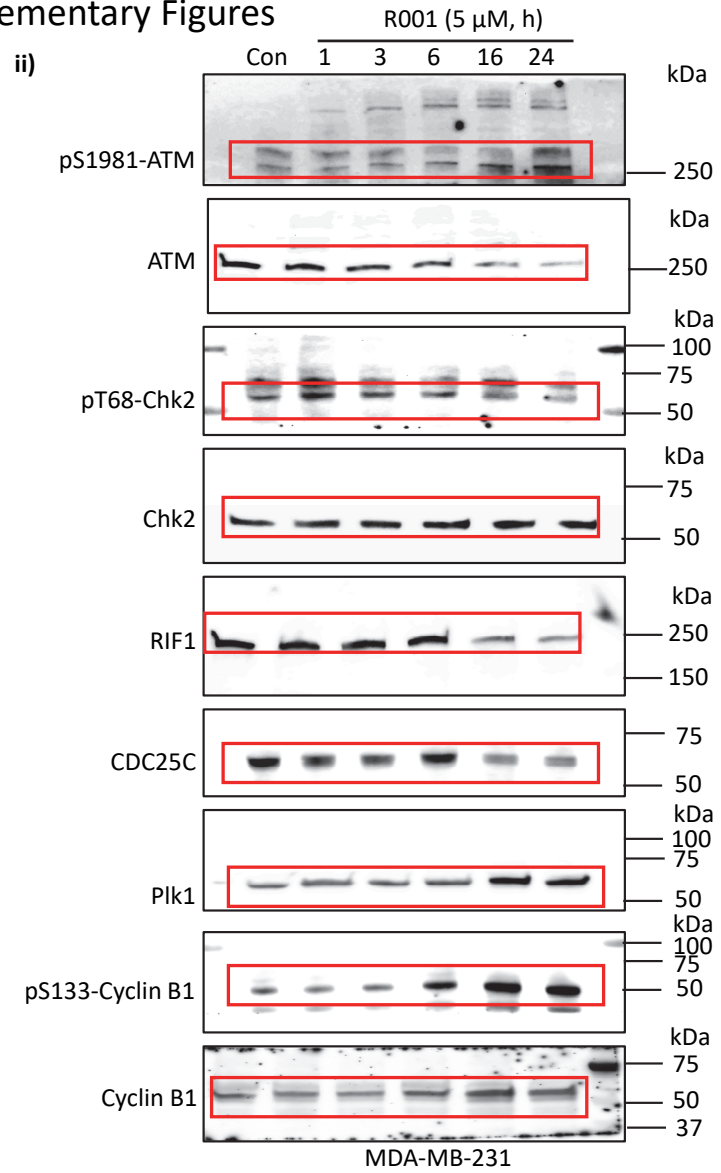



Fig.5F

Supplementary Figures

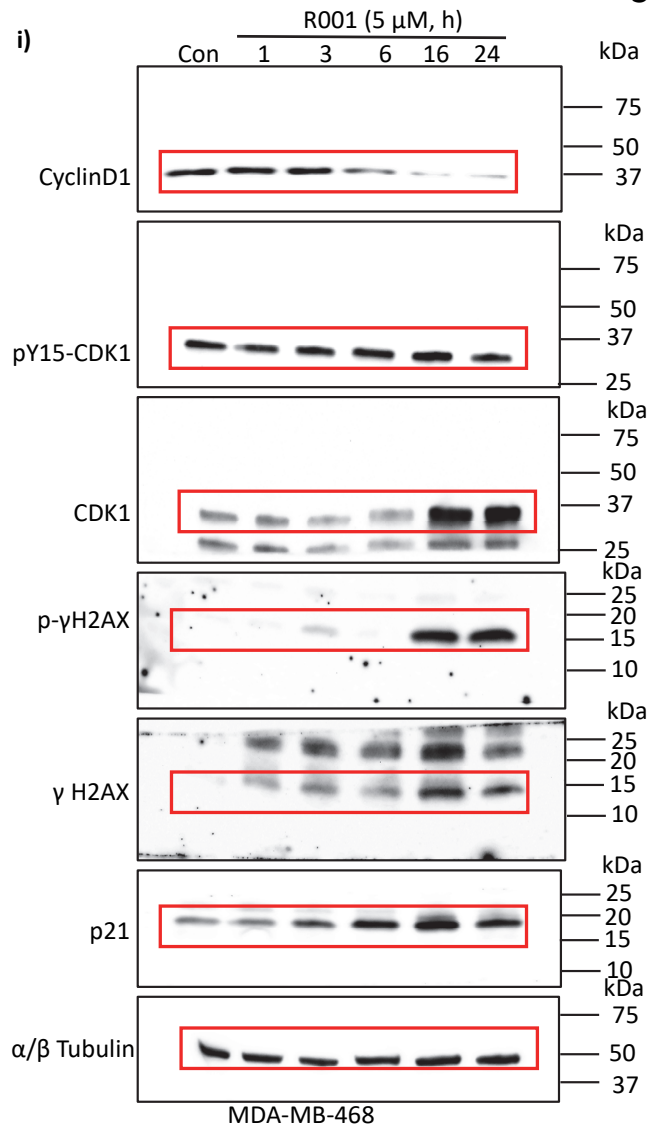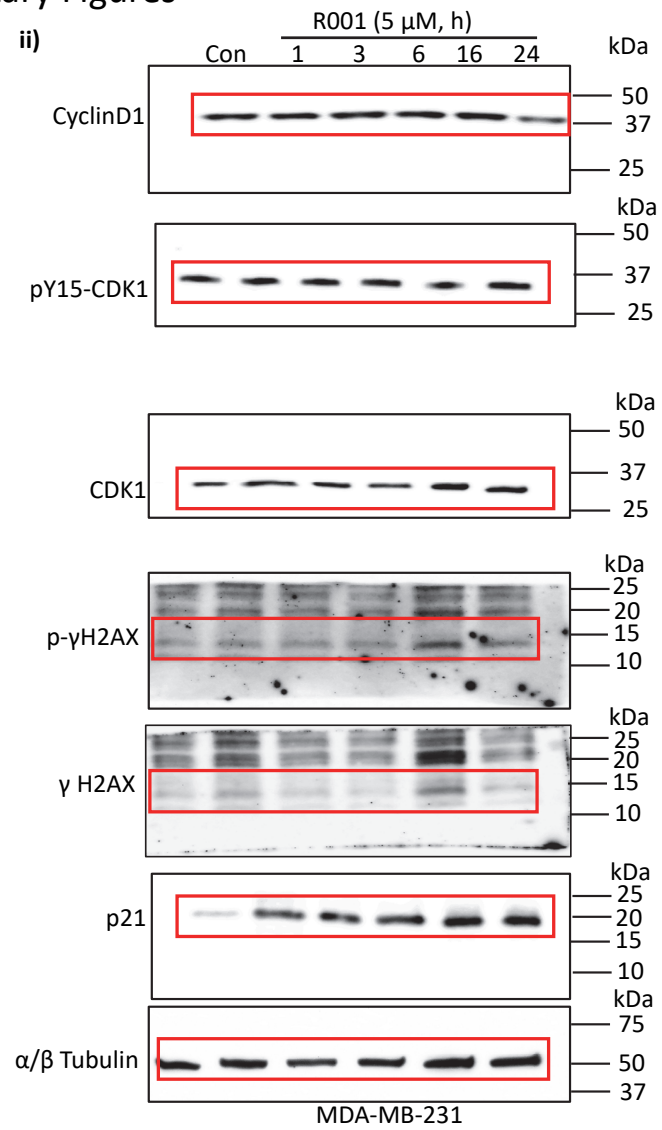



Fig. S2.

### Supplementary Figures

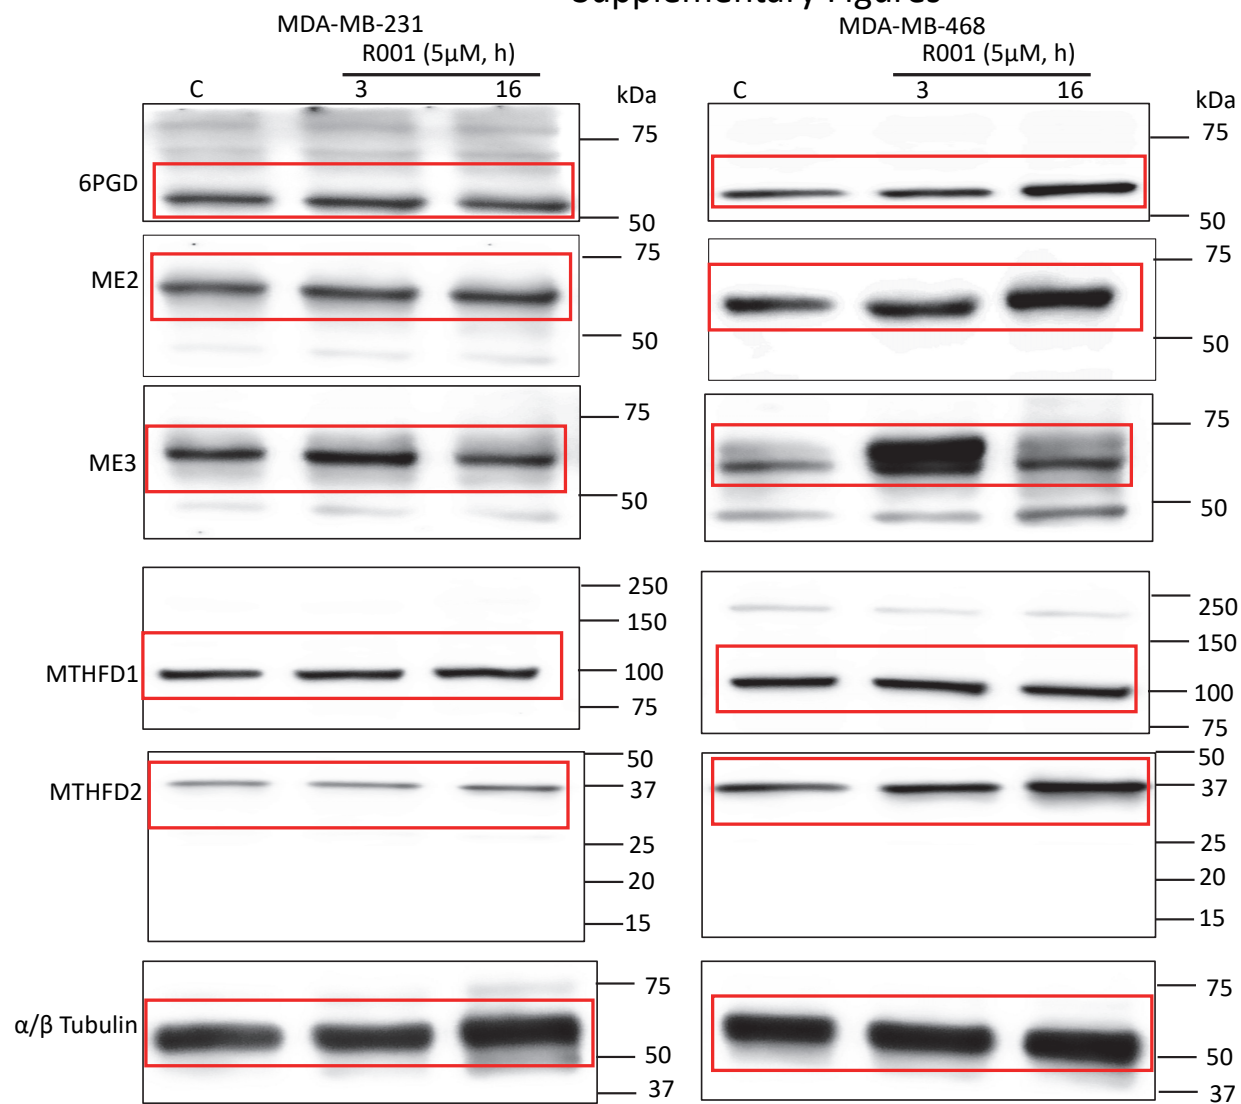

Supplementary Figures

Fig. S6.

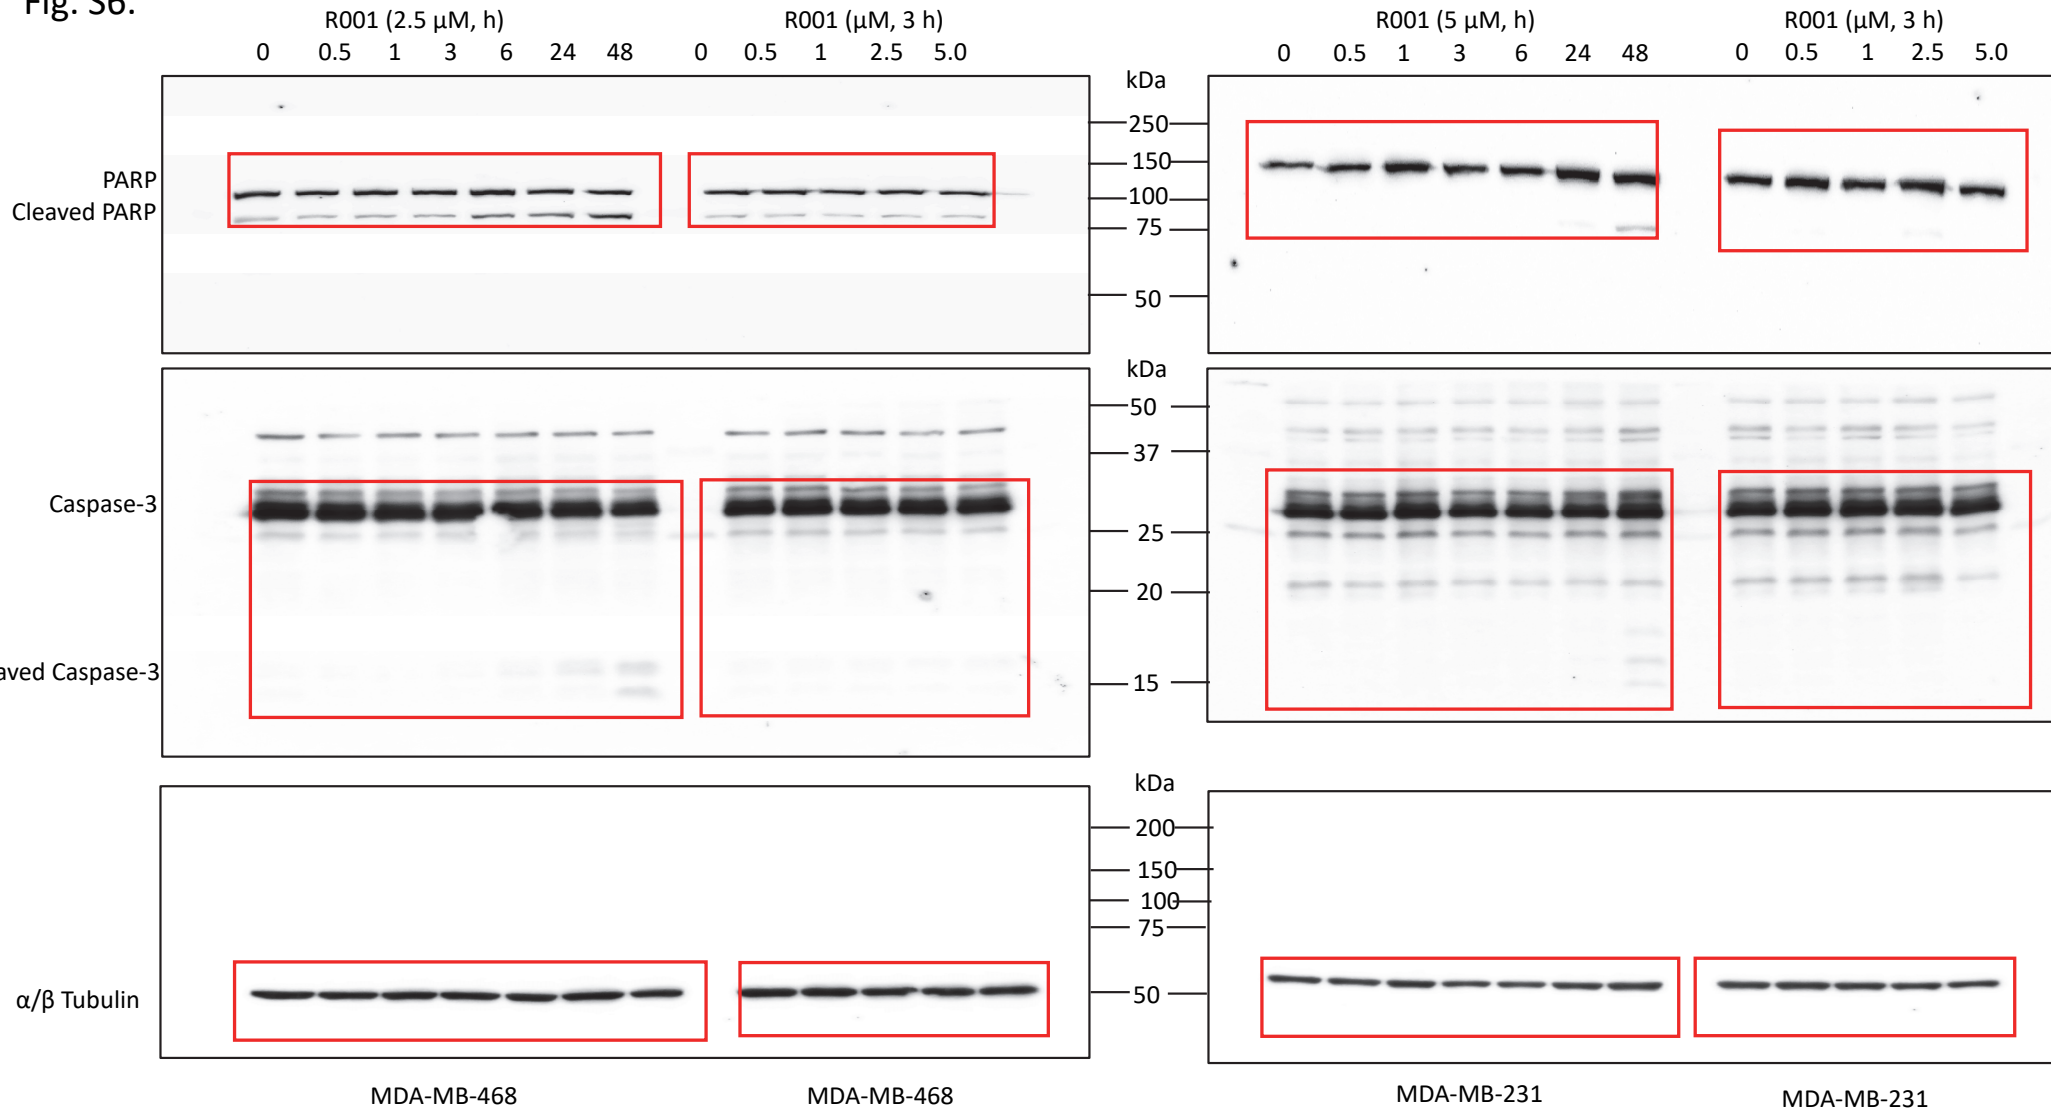

Supplement: 41419_2022_5477_MOESM3_ESM.pdf [file 41419_2022_5477_MOESM3_ESM.pdf]
