# Supplementary material for: Natural product preferentially targets redox and metabolic adaptations and aberrantly active STAT3 to inhibit breast tumor growth in vivo
Source: PubMed Central journal article supplement (PMC9726930; doi:10.1038/s41419-022-05477-2), 2022-12-06

# Supplementary Figures

Fig. S1.

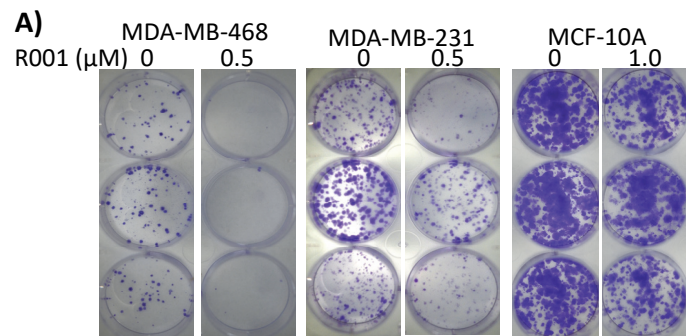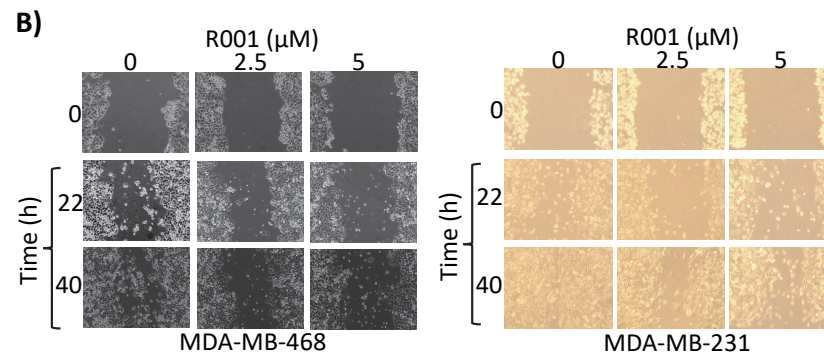

## Supplementary Figures

Fig. S2.

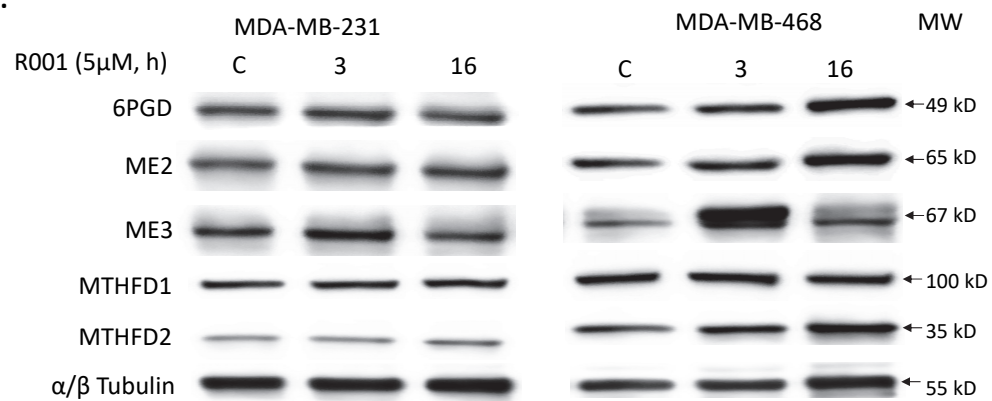

Fig. S3. Supplementary Figures

A) Quantified ROS production by staining with CellRox DeepRed

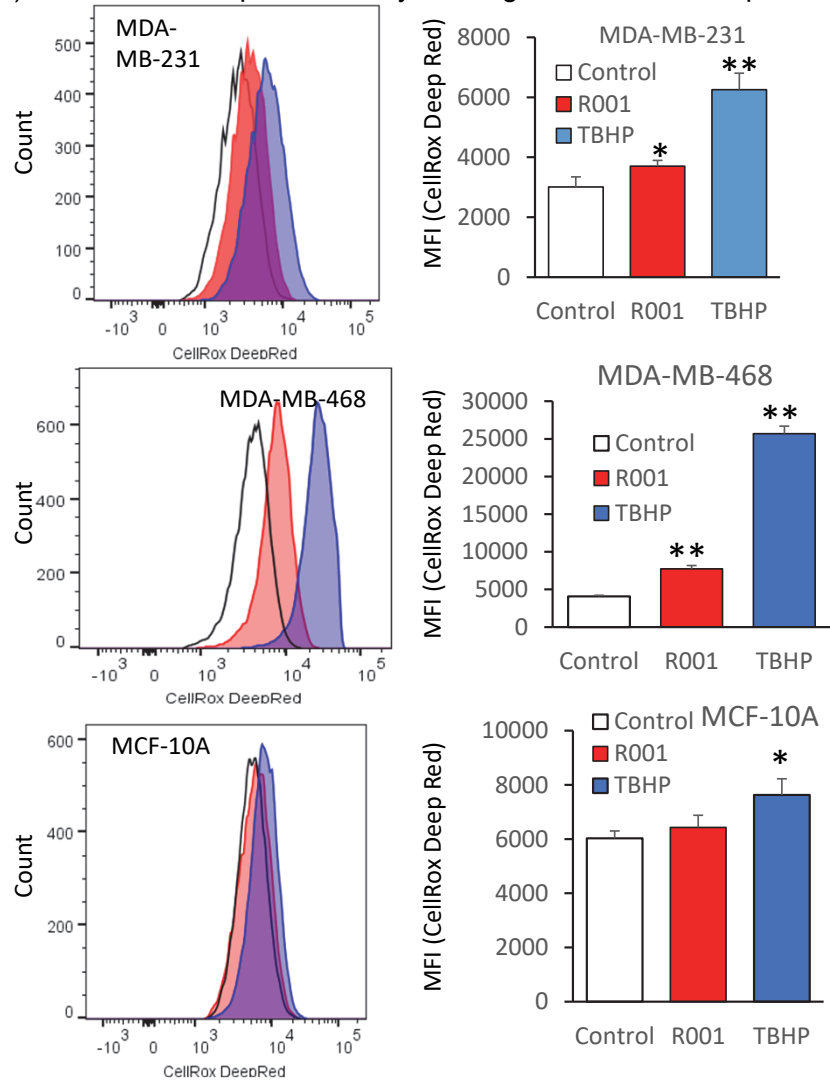

B) Quantification of the source of ROS

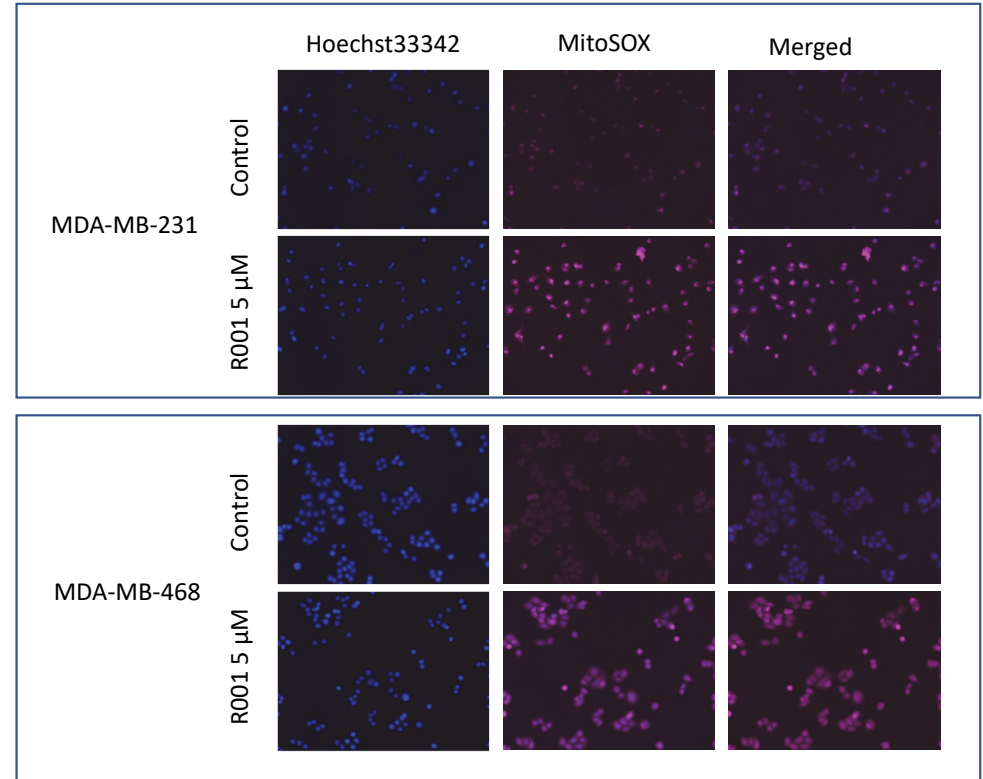

## Supplementary Figures

Fig. S4.

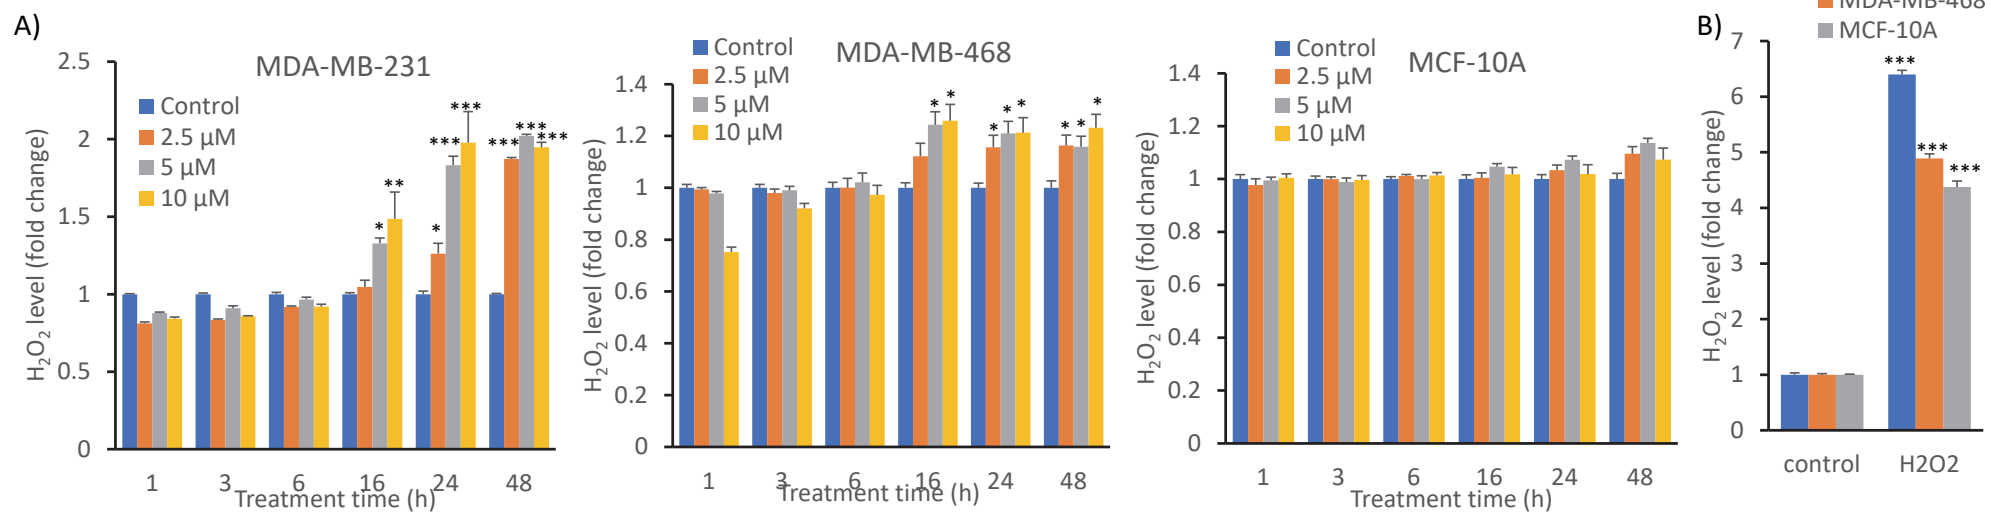

# Supplementary Figures

Fig. S5.

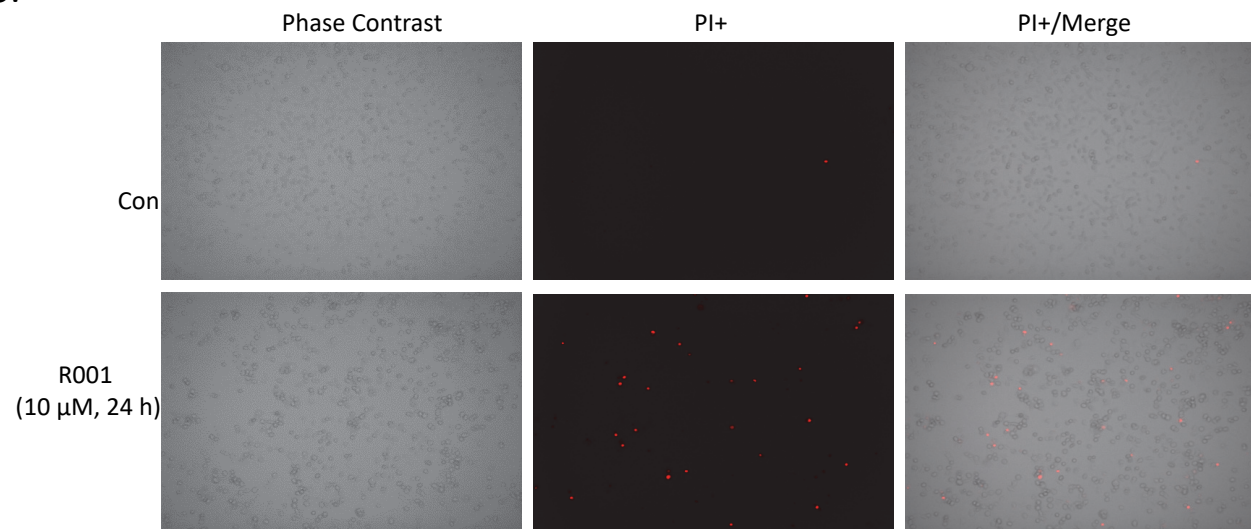

## Supplementary Figures

Fig. S6.

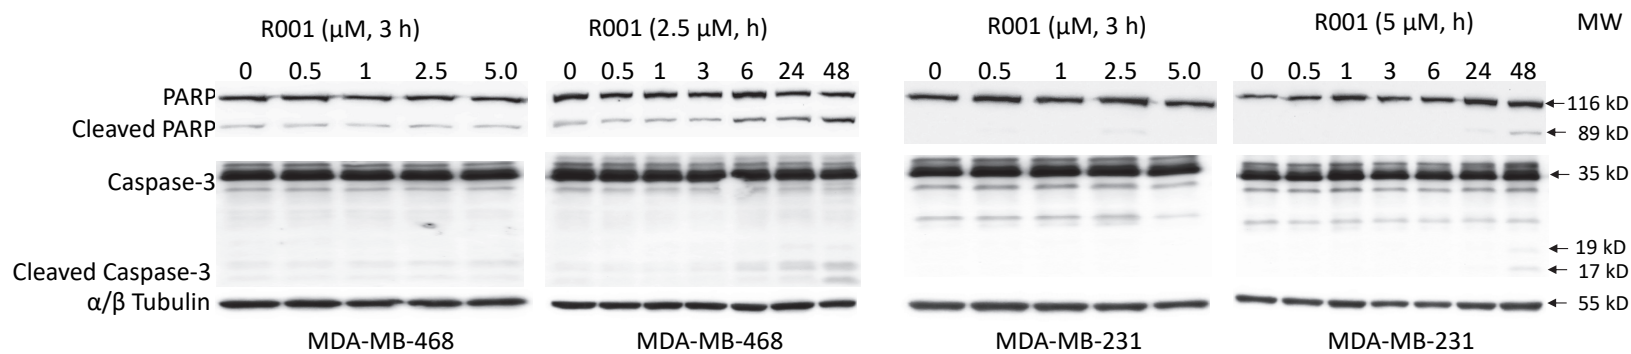

# Supplementary Figures

Fig. S7.

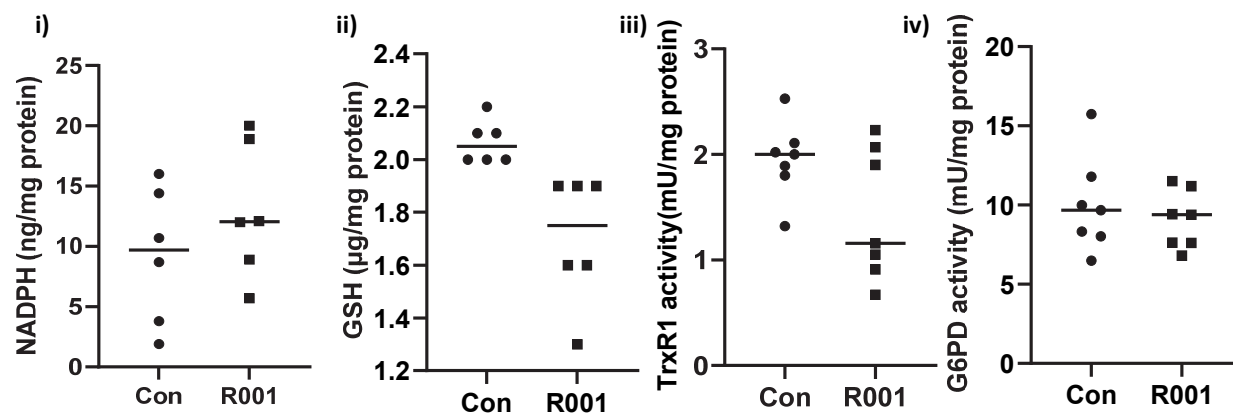

## Supplementary Figures

Fig. S8.

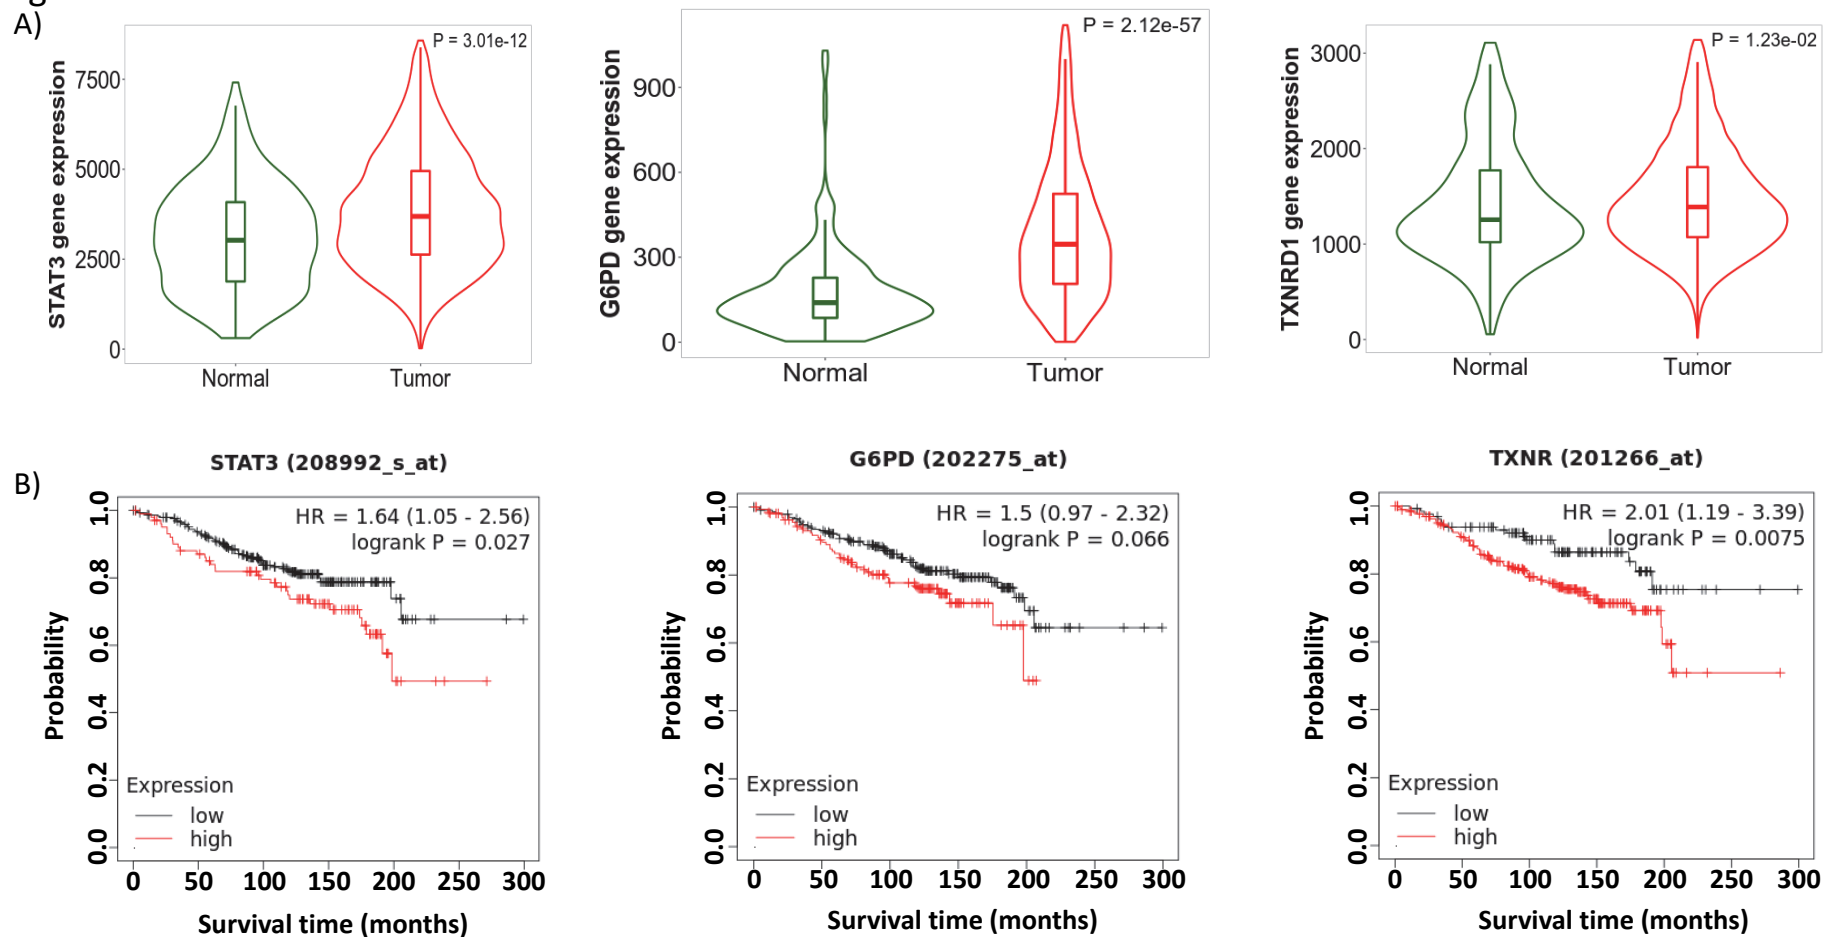

Supplement: 41419_2022_5477_MOESM2_ESM.pdf [file 41419_2022_5477_MOESM2_ESM.pdf]
